# Supplementary material for: Delimiting the boundaries of sesamoid identities under the network theory framework
Source: PeerJ journal article supplement (doi:10.7717/peerj.9691), 2020-08-17
Supplement: Supplemental_Table_S1.pdf [file Supplemental_Table_S1.pdf]

**Supplemental Table S1:** Adjacency matrix.

**Legend:** Two first columns indicate pairs of connected elements. Third column indicates the connection type. Abbreviations: F: finger FP: forelimb phalanx, HF: hindlimb phalanx, (f) forelimb, (h): hindlimb, T: toes, V: vertebra.

| First element   | Second element  | Type of connection |
|-----------------|-----------------|--------------------|
| cranium         | atlas           | Joint              |
| atlas           | V2              | Joint              |
| V2              | V3              | Joint              |
| V3              | V4              | Joint              |
| V4              | V5              | Joint              |
| V5              | V6              | Joint              |
| V6              | V7              | Joint              |
| V8              | sacral vertebra | Joint              |
| sacral vertebra | urostyle        | Joint              |
| sacral vertebra | ilium           | Joint              |
| sacral vertebra | sacral sesamoid | ligament           |
| sacral sesamoid | ilium           | ligament           |
| ilium           | ischium         | Joint              |
| ilium           | pubis           | Joint              |
| ischium         | pubis           | Joint              |
| suprascapula    | cleithrum       | Joint              |
| cleithrum       | scapula         | Joint              |
| scapula         | clavicle        | Joint              |
| clavicle        | coracoid        | Joint              |
| clavicle        | episternum      | Joint              |
| episternum      | omosternum      | Joint              |
| clavicle        | procoracoid     | Joint              |
| clavicle        | epicoracoid     | Joint              |
| procoracoid     | epicoracoid     | Joint              |
| coracoid        | epicoracoid     | Joint              |
| coracoid        | mesosternum     | Joint              |

|              |              |       |
|--------------|--------------|-------|
| epicoracoid  | mesosternum  | Joint |
| epicoracoid  | episternum   | Joint |
| mesosternum  | xiphisternum | Joint |
| clavicle     | humerus      | Joint |
| coracoid     | humerus      | Joint |
| scapula      | humerus      | Joint |
| humerus      | radioulna    | Joint |
| radioulna    | radiale      | Joint |
| radioulna    | ulnare       | Joint |
| radiale      | ulnare       | Joint |
| radiale      | EL Y(F)      | Joint |
| EL Y(F)      | PREP PROX    | Joint |
| PREP PROX    | PREP DIST    | Joint |
| radiale      | CARPAL 2     | Joint |
| radiale      | CARPAL 3-4-5 | Joint |
| ulnare       | CARPAL 3-4-5 | Joint |
| radiale      | METC 2       | Joint |
| CARPAL 2     | METC 2       | Joint |
| EL Y(F)      | METC 2       | Joint |
| CARPAL 3-4-5 | METC 3       | Joint |
| CARPAL 3-4-5 | METC 4       | Joint |
| CARPAL 3-4-5 | METC 5       | Joint |
| METC 2       | FFI D2       | Joint |
| FFI D2       | FFII D2      | Joint |
| METC 3       | FFI D3       | Joint |
| FFI D3       | FFII D3      | Joint |
| METC 4       | FFI D4       | Joint |
| FFI D4       | FFII D4      | Joint |
| FFII D4      | FFIII D4     | Joint |
| METC 5       | FFI D5       | Joint |
| FFI D5       | FFII D5      | Joint |

|            |            |       |
|------------|------------|-------|
| FFII D5    | FFIII D5   | Joint |
| HFII D1    | HFI D1     | Joint |
| HFI D1     | METT 1     | Joint |
| HFII D2    | HFI D2     | Joint |
| HFI D2     | METT 2     | Joint |
| HFIII D3   | HFII D3    | Joint |
| HFII D3    | HFI D3     | Joint |
| HFI D3     | METT 3     | Joint |
| HFIV D4    | HFIII D4   | Joint |
| HFIII D4   | HFII D4    | Joint |
| HFII D4    | HFI D4     | Joint |
| HFI D4     | METT 4     | Joint |
| HFIII D5   | HFII D5    | Joint |
| HFII D5    | HFI D5     | Joint |
| HFI D5     | METT 5     | Joint |
| METT 1     | METT 2     | Joint |
| METT 2     | METT 3     | Joint |
| METT 3     | METT 4     | Joint |
| METT 4     | METT 5     | Joint |
| PREH DIST  | PREH PROX  | Joint |
| EL Y(H)    | METT 1     | Joint |
| EL Y(H)    | PREH PROX  | Joint |
| PREH PROX  | METT 1     | Joint |
| EL Y(H)    | TARSAL 1   | Joint |
| TARSAL 1   | METT 2     | Joint |
| TARSAL 1   | TARSAL 2-3 | Joint |
| TARSAL 2-3 | METT 2     | Joint |
| TARSAL 2-3 | METT 3     | Joint |
| tibiale    | EL Y(H)    | Joint |
| tibiale    | TARSAL 1   | Joint |
| tibiale    | TARSAL 2-3 | Joint |

|                         |                         |              |
|-------------------------|-------------------------|--------------|
| fibulare                | TARSAL 2-3              | Joint        |
| fibulare                | METT 5                  | Joint        |
| tibiale                 | TIBFIB                  | Joint        |
| fibulare                | TIBFIB                  | Joint        |
| TIBFIB                  | femur                   | Joint        |
| TIBFIB                  | femur                   | Tendo-muscle |
| HFI D1                  | glide mett D1           | Tendo-muscle |
| glide mett D1           | METT 1                  | Tendo-muscle |
| HFI D2                  | glide mett D2           | Tendo-muscle |
| glide mett D2           | METT 2                  | Tendo-muscle |
| HFII D3                 | glide inter HFII-I D3   | Tendo-muscle |
| glide inter HFII-I D3   | HFI D3                  | Tendo-muscle |
| HFI D3                  | glide mett D3           | Tendo-muscle |
| glide mett D3           | METT 3                  | Tendo-muscle |
| HFIII D4                | glide inter HFIII-II D4 | Tendo-muscle |
| glide inter HFIII-II D4 | HFII D4                 | Tendo-muscle |
| HFII D4                 | glide inter HFII-I D4   | Tendo-muscle |
| glide inter HFII-I D4   | HFI D4                  | Tendo-muscle |
| HFI D4                  | glide mett D4           | Tendo-muscle |
| glide mett D4           | METT 4                  | Tendo-muscle |
| HFII D5                 | glide inter HFII-I D5   | Tendo-muscle |
| glide inter HFII-I D5   | HFI D5                  | Tendo-muscle |
| HFI D5                  | glide mett D5           | Tendo-muscle |
| glide mett D5           | METT 5                  | Tendo-muscle |
| TIBFIB                  | CARTILAGO SESAMOIDE     | tendo-muscle |
| CARTILAGO SESAMOIDE     | Ses1 aponeurosis        | tendo-muscle |
| CARTILAGO SESAMOIDE     | Ses2 aponeurosis        | tendo-muscle |
| CARTILAGO SESAMOIDE     | HFI D1                  | tendo-muscle |
| CARTILAGO SESAMOIDE     | HFI D2                  | tendo-muscle |

|                        |                      |               |
|------------------------|----------------------|---------------|
| CARTILAGO<br>SESAMOIDE | HFI D3               | tendo-muscle  |
| femur                  | OS SESAMOIDES        | tendo-muscle  |
| TIBFIB                 | OS SESAMOIDES        | tendo-muscle  |
| OS SESAMOIDES          | Ses1 aponeurosis     | tendinous     |
| OS SESAMOIDES          | Ses2 aponeurosis     | tendinous     |
| OS SESAMOIDES          | HFI D1               | tendinous     |
| OS SESAMOIDES          | HFI D2               | tendinous     |
| OS SESAMOIDES          | HFI D3               | tendinous     |
| TIBFIB                 | Ses1 aponeurosis     | tendinous     |
| tibiale                | Ses1 aponeurosis     | tendinous     |
| fibulare               | Ses1 aponeurosis     | tendinous     |
| TIBFIB                 | Ses2 aponeurosis     | tendinous     |
| tibiale                | Ses2 aponeurosis     | tendinous     |
| fibulare               | Ses2 aponeurosis     | tendinous     |
| Ses1 aponeurosis       | Ses2 aponeurosis     | tendinous     |
| Ses1 aponeurosis       | HFII D1              | tendinous     |
| Ses1 aponeurosis       | HFII D2              | tendinous     |
| Ses1 aponeurosis       | HFIII D3             | tendinous     |
| Ses2 aponeurosis       | HFI D1               | tendinous     |
| Ses2 aponeurosis       | HFII D2              | tendinous     |
| Ses2 aponeurosis       | HFIII D3             | tendinous     |
| TIBFIB                 | Ses flexor digitorum | tendo-muscle  |
| tibiale                | Ses flexor digitorum | tendo-muscle  |
| fibulare               | Ses flexor digitorum | tendo-muscle  |
| Ses flexor digitorum   | HFIII D3             | tendon flexor |
| Ses flexor digitorum   | HFIV D4              | tendon flexor |
| Ses flexor digitorum   | HFIII D5             | tendon flexor |
| cranium                | fascia dorsalis      | muscle        |
| cranium                | V2                   | muscle        |
| cranium                | V3                   | muscle        |
| V2                     | V3                   | muscle        |

|                 |                 |        |
|-----------------|-----------------|--------|
| V3              | V4              | muscle |
| V4              | V5              | muscle |
| V5              | V6              | muscle |
| V6              | V7              | muscle |
| V8              | sacral vertebra | muscle |
| cranium         | suprascapula    | muscle |
| fascia dorsalis | humerus         | muscle |
| V4              | suprascapula    | muscle |
| cranium         | urostyle        | muscle |
| V3              | urostyle        | muscle |
| V4              | urostyle        | muscle |
| V5              | urostyle        | muscle |
| V6              | urostyle        | muscle |
| V8              | urostyle        | muscle |
| sacral vertebra | urostyle        | muscle |
| V4              | ilium           | muscle |
| V5              | ilium           | muscle |
| V6              | ilium           | muscle |
| V7              | ilium           | muscle |
| urostyle        | ilium           | muscle |
| pubis           | xiphisternum    | muscle |
| pubis           | mesosternum     | muscle |
| fascia dorsalis | ilium           | muscle |
| fascia dorsalis | suprascapula    | muscle |
| fascia dorsalis | xiphisternum    | muscle |
| ilium           | pubis           | muscle |
| fascia dorsalis | xiphisternum    | muscle |
| fascia dorsalis | mesosternum     | muscle |
| urostyle        | femur           | muscle |
| ilium           | femur           | muscle |
| ilium           | Patella         | muscle |

|                  |                  |              |
|------------------|------------------|--------------|
| ilium            | femur            | muscle       |
| ilium            | Patella          | muscle       |
| ilium            | Patella          | muscle       |
| ilium            | femur            | muscle       |
| ilium            | pubis            | muscle       |
| ilium            | femur            | muscle       |
| ilium            | pubis            | muscle       |
| ischium          | femur            | muscle       |
| ischium          | femur            | muscle       |
| ischium          | femur            | muscle       |
| ischium          | femur            | muscle       |
| ischium          | femur            | muscle       |
| ischium          | femur            | muscle       |
| ilium            | Patella          | muscle       |
| ischium          | Patella          | muscle       |
| ischium          | Patella          | muscle       |
| ischium          | Graciella        | tendo-muscle |
| Graciella        | Patella          | tendo-muscle |
| Graciella        | TIBFIB           | tendo-muscle |
| ilium            | TIBFIB           | muscle       |
| ischium          | TIBFIB           | muscle       |
| femur            | tibiale          | muscle       |
| femur            | fibulare         | muscle       |
| femur            | tibiale          | muscle       |
| femur            | fibulare         | muscle       |
| femur            | TIBFIB           | muscle       |
| TIBFIB           | tibiale          | muscle       |
| femur            | Ses1 aponeurosis | tendo-muscle |
| femur            | Ses2 aponeurosis | tendo-muscle |
| Ses1 aponeurosis | PREH PROX        | tendinous    |
| Ses2 aponeurosis | PREH PROX        | tendinous    |

|           |           |              |
|-----------|-----------|--------------|
| PREH DIST | PREH PROX | tendinous    |
| TIBFIB    | HFII D1   | tendinous    |
| femur     | HFII D2   | tendinous    |
| TIBFIB    | HFII D2   | tendinous    |
| femur     | HFIII D3  | tendinous    |
| TIBFIB    | HFIII D3  | tendinous    |
| TIBFIB    | tibiale   | tendo-muscle |
| TIBFIB    | fibulare  | tendo-muscle |
| tibiale   | fibulare  | tendo-muscle |
| TIBFIB    | PREH PROX | tendo-muscle |
| TIBFIB    | HFIII D3  | tendo-muscle |
| TIBFIB    | HFIII D4  | tendo-muscle |
| TIBFIB    | HFIII D5  | tendo-muscle |
| tibiale   | EL Y(H)   | muscle       |
| fibulare  | EL Y(H)   | muscle       |
| TIBFIB    | tibiale   | muscle       |
| TIBFIB    | METT 2    | muscle       |
| TIBFIB    | METT 3    | muscle       |
| TIBFIB    | METT 4    | muscle       |
| fibulare  | METT 5    | muscle       |
| femur     | PREH PROX | tendo-muscle |
| femur     | PREH DIST | tendo-muscle |
| TIBFIB    | PREH PROX | tendo-muscle |
| TIBFIB    | PREH DIST | tendo-muscle |
| femur     | METT 1    | tendo-muscle |
| femur     | METT 1    | tendo-muscle |
| femur     | HFI D1    | tendo-muscle |
| femur     | METT 2    | tendo-muscle |
| femur     | HFI D2    | tendo-muscle |
| femur     | METT 3    | tendo-muscle |
| femur     | HFI D3    | tendo-muscle |



|            |          |              |
|------------|----------|--------------|
| femur      | METT 4   | tendo-muscle |
| femur      | HFI D4   | tendo-muscle |
| femur      | HFI D5   | tendo-muscle |
| femur      | HFI D5   | tendo-muscle |
| femur      | HFII D3  | tendo-muscle |
| TIBFIB     | METT 1   | tendo-muscle |
| TIBFIB     | METT 1   | tendo-muscle |
| TIBFIB     | HFI D1   | tendo-muscle |
| TIBFIB     | METT 2   | tendo-muscle |
| TIBFIB     | HFI D2   | tendo-muscle |
| TIBFIB     | METT 3   | tendo-muscle |
| TIBFIB     | HFI D3   | tendo-muscle |
| TIBFIB     | METT 4   | tendo-muscle |
| TIBFIB     | HFI D4   | tendo-muscle |
| TIBFIB     | HFI D5   | tendo-muscle |
| TIBFIB     | HFI D5   | tendo-muscle |
| TIBFIB     | HFII D3  | tendo-muscle |
| METT 4     | HFI D4   | muscle       |
| METT 4     | HFII D4  | muscle       |
| METT 4     | HFIII D4 | muscle       |
| METT 4     | HFI D5   | muscle       |
| METT 4     | HFII D5  | muscle       |
| TARSAL 2-3 | METT 1   | muscle       |
| TARSAL 2-3 | HFI D1   | muscle       |
| TARSAL 2-3 | METT 1   | muscle       |
| fibulare   | METT 2   | muscle       |
| fibulare   | METT 1   | muscle       |
| fibulare   | METT 3   | muscle       |
| fibulare   | METT 4   | muscle       |
| METT 2     | HFI D2   | muscle       |
| METT 3     | HFI D3   | muscle       |

|          |           |        |
|----------|-----------|--------|
| METT 4   | HFI D4    | muscle |
| METT 5   | HFI D5    | muscle |
| METT 1   | METT 2    | muscle |
| METT 2   | METT 3    | muscle |
| METT 3   | METT 4    | muscle |
| METT 4   | METT 5    | muscle |
| HFI D3   | HFII D3   | muscle |
| HFI D4   | HFII D4   | muscle |
| HFI D5   | HFII D5   | muscle |
| METT 4   | METT 5    | muscle |
| fibulare | METT 5    | muscle |
| fibulare | METT 1    | muscle |
| fibulare | PREH PROX | muscle |
| fibulare | PREH DIST | muscle |
| fibulare | HFI D1    | muscle |
| fibulare | HFI D2    | muscle |
| fibulare | HFI D3    | muscle |
| fibulare | HFI D4    | muscle |
| fibulare | HFII D4   | muscle |
| fibulare | HFI D5    | muscle |
| tibiale  | HFI D1    | muscle |
| fibulare | HFI D1    | muscle |
| tibiale  | HFI D2    | muscle |
| fibulare | HFI D2    | muscle |
| tibiale  | HFI D3    | muscle |
| fibulare | HFI D3    | muscle |
| EL Y(H)  | HFII D1   | muscle |
| METT 1   | HFII D1   | muscle |
| METT 1   | HFI D2    | muscle |
| METT 2   | HFII D2   | muscle |
| METT 2   | HFIII D3  | muscle |

|              |              |              |
|--------------|--------------|--------------|
| METT 3       | HFIII D3     | muscle       |
| tibiale      | METT 4       | muscle       |
| tibiale      | HFI D4       | muscle       |
| tibiale      | HFIV D4      | muscle       |
| METT 4       | HFIV D4      | muscle       |
| METT 5       | HFIV D4      | muscle       |
| METT 5       | HFIII D5     | muscle       |
| PREH PROX    | METT 1       | muscle       |
| EL Y(H)      | METT 1       | muscle       |
| cranium      | suprascapula | muscle       |
| cranium      | scapula      | muscle       |
| cranium      | scapula      | muscle       |
| V3           | scapula      | tendon       |
| V4           | scapula      | muscle       |
| V3           | scapula      | muscle       |
| V3           | scapula      | muscle       |
| V4           | scapula      | muscle       |
| suprascapula | scapula      | tendo-muscle |
| coracoid     | humerus      | muscle       |
| suprascapula | humerus      | tendo-muscle |
| mesosternum  | humerus      | muscle       |
| epicoracoid  | humerus      | muscle       |
| mesosternum  | humerus      | muscle       |
| xiphisternum | humerus      | muscle       |
| coracoid     | humerus      | muscle       |
| episternum   | radioulna    | tendo-muscle |
| omosternum   | radioulna    | tendo-muscle |
| coracoid     | radioulna    | tendo-muscle |
| clavicle     | humerus      | muscle       |
| procoracoid  | humerus      | muscle       |
| scapula      | humerus      | muscle       |

|               |                 |              |
|---------------|-----------------|--------------|
| omosternum    | humerus         | muscle       |
| scapula       | radioulna       | tendo-muscle |
| humerus       | radioulna       | tendo-muscle |
| humerus       | EL Y(F)         | tendo-muscle |
| humerus       | radiale         | tendo-muscle |
| humerus       | palmar sesamoid | tendo-muscle |
| radioulna     | palmar sesamoid | muscle       |
| humerus       | radioulna       | tendo-muscle |
| humerus       | CARPAL 3-4-5    | tendo-muscle |
| humerus       | radioulna       | tendo-muscle |
| humerus       | METC 3          | tendo-muscle |
| humerus       | METC 4          | tendo-muscle |
| humerus       | METC 5          | tendo-muscle |
| radioulna     | ulnare          | muscle       |
| humerus       | pararadial      | muscle       |
| pararadial    | radiale         | muscle       |
| humerus       | CARPAL 3-4-5    | muscle       |
| humerus       | ulnare          | muscle       |
| humerus       | radioulna       | muscle       |
| radioulna     | PREP PROX       | muscle       |
| radioulna     | PREP DIST       | muscle       |
| ulnare        | PREP PROX       | muscle       |
| ulnare        | PREP DIST       | muscle       |
| CARPAL 3-4-5  | PREP PROX       | muscle       |
| CARPAL 3-4-5  | PREP DIST       | muscle       |
| CARPAL 3-4-5  | FFII D2         | tendo-muscle |
| CARPAL 3-4-5  | FFI D2          | tendo-muscle |
| CARPAL 3-4-5  | glide metc D2   | tendo-muscle |
| glide metc D2 | FFI D2          | tendo-muscle |
| CARPAL 3-4-5  | METC 2          | muscle       |
| CARPAL 3-4-5  | FFII D3         | muscle       |

|                       |                       |              |
|-----------------------|-----------------------|--------------|
| palmar sesamoid       | FFII D3               | tendon       |
| CARPAL 3-4-5          | glide metc D3         | tendo-muscle |
| glide metc D3         | FFI D3                | tendo-muscle |
| METC 3                | FFI D3                | tendo-muscle |
| CARPAL 3-4-5          | METC 3                | tendo-muscle |
| palmar sesamoid       | FFIII D4              | tendon       |
| palmar sesamoid       | FFII D4               | muscle       |
| palmar sesamoid       | glide metc D4         | tendo-muscle |
| glide metc D4         | FFI D4                | tendo-muscle |
| FFI D4                | glide inter FFII-I D4 | tendo-muscle |
| glide inter FFII-I D4 | FFII D4               | tendo-muscle |
| METC 4                | FFI D4                | muscle       |
| CARPAL 3-4-5          | METC 4                | tendo-muscle |
| palmar sesamoid       | FFIII D5              | tendon       |
| palmar sesamoid       | FFII D5               | tendo-muscle |
| CARPAL 3-4-5          | glide metc D5         | tendo-muscle |
| glide metc D5         | FFI D5                | tendo-muscle |
| palmar sesamoid       | glide metc D5         | tendo-muscle |
| glide metc D5         | FFI D5                | tendo-muscle |
| CARPAL 3-4-5          | METC 5                | muscle       |
| CARPAL 3-4-5          | METC 5                | muscle       |
| CARPAL 3-4-5          | FFI D5                | muscle       |
| palmar sesamoid       | METC 5                | muscle       |
| CARPAL 3-4-5          | METC 5                | muscle       |
| radioulna             | METC 5                | muscle       |
| ulnare                | METC 5                | muscle       |
| METC 5                | FFI D5                | muscle       |
| FFI D5                | glide inter FFII-I D5 | tendo-muscle |
| glide inter FFII-I D5 | FFII D5               | tendo-muscle |
| METC 2                | METC 3                | muscle       |
| METC 3                | METC 4                | muscle       |

|              |              |              |
|--------------|--------------|--------------|
| METC 4       | METC 5       | muscle       |
| ulnare       | CARPAL 3-4-5 | muscle       |
| humerus      | METC 2       | tendo-muscle |
| radioulna    | METC 2       | tendo-muscle |
| radioulna    | FFII D2      | tendo-muscle |
| ulnare       | FFII D2      | tendo-muscle |
| EL Y(F)      | METC 2       | tendo-muscle |
| CARPAL 2     | METC 2       | tendo-muscle |
| METC 2       | FFII D2      | tendo-muscle |
| EL Y(F)      | METC 2       | muscle       |
| CARPAL 2     | METC 2       | muscle       |
| ulnare       | FFI D3       | tendo-muscle |
| EL Y(F)      | FFII D3      | tendo-muscle |
| CARPAL 2     | FFII D3      | tendo-muscle |
| radiale      | FFII D3      | tendo-muscle |
| METC 3       | FFII D3      | tendo-muscle |
| ulnare       | FFI D4       | tendo-muscle |
| CARPAL 3-4-5 | FFI D4       | tendo-muscle |
| EL Y(F)      | FFII D4      | tendo-muscle |
| CARPAL 2     | FFII D4      | tendo-muscle |
| radiale      | FFII D4      | tendo-muscle |
| METC 4       | FFIII D4     | tendo-muscle |
| METC 3       | FFIII D4     | tendo-muscle |
| METC 5       | FFIII D4     | tendo-muscle |
| CARPAL 3-4-5 | FFI D5       | tendo-muscle |
| METC 5       | FFIII D5     | tendo-muscle |
| METC 4       | FFIII D5     | tendon       |
| CARPAL 3-4-5 | METC 5       | muscle       |
